## The expression of histone deacetylase HDAC1 correlates with the progression and prognosis of gastrointestinal malignancy

Lin-Lin Cao<sup>1,\*</sup>, Zhihong Yue<sup>1,\*</sup>, Lianhua Liu<sup>1</sup>, Lin Pei<sup>1</sup>, Yue Yin<sup>1</sup>, Li Qin<sup>1</sup>, Jie Zhao<sup>1</sup>, Huixin Liu<sup>2</sup>, Hui Wang<sup>1</sup> and Mei Jia<sup>1</sup>

<sup>1</sup>Department of Clinical Laboratory, Peking University People's Hospital, Beijing 100044, People's Republic of China

<sup>2</sup>Research Office, Peking University People's Hospital, Beijing 100044, People's Republic of China

\*These authors contributed equally to this work

Correspondence to: Lin-Lin Cao, email: caollpku@163.com  
Mei Jia, email: jiameipku@163.com

**Keywords:** HDAC1, meta-analysis, gastrointestinal malignancy, clinical feature, overall survival

**Received:** December 21, 2016

**Accepted:** March 17, 2017

**Published:** April 05, 2017

**Copyright:** Cao et al. This is an open-access article distributed under the terms of the Creative Commons Attribution License (CC-BY), which permits unrestricted use, distribution, and reproduction in any medium, provided the original author and source are credited.

### ABSTRACT

**Gastrointestinal malignancy is a severe public health threat worldwide, and survival for most types of gastrointestinal cancer is very poor. Therefore, finding better cancer biomarkers to diagnose gastrointestinal malignancy and predict patient survival is essential. HDAC1 has been reported to be closely associated with several types of cancer, but the precise role of HDAC1 in gastrointestinal cancer is not clear. Recently, quite a few studies have investigated the correlation between HDAC1 expression and clinical features or prognosis in multiple types of gastrointestinal malignancies, but the results were inconsistent. In this study, we systematically reviewed the association between HDAC1 and gastrointestinal malignancy using meta-analysis methods, and 28 eligible studies were analyzed. We found that the expression level of HDAC1 in gastrointestinal malignancies, especially in colorectal cancer (OR = 10.84, 95% CI = 5.33–22.07, P < 0.00001), was higher than that in noncancerous tissue, and HDAC1 expression was closely associated with some clinical features of gastrointestinal cancer patients, such as tumor stage (OR = 1.62, 95% CI = 1.28–2.05, P < 0.0001) and tumor grade (OR = 1.75, 95% CI = 1.03–2.95, P = 0.04). In addition, we also found that patients with low HDAC1 expression showed better overall survival than those with high HDAC1 expression in gastrointestinal malignancy, especially in gastric cancer (HR = 1.88, 95% CI = 1.14–3.12, P = 0.01). Our results strongly suggest that HDAC1 may serve as a good diagnostic and prognostic marker for gastrointestinal malignancy.**

### INTRODUCTION

Gastrointestinal malignancies present an ever-increasing global public health threat, including several types of cancer, such as esophageal, gastric, liver, pancreatic and colorectal cancer. These malignancies have a high mortality rate, especially in less developed regions of the world [1]. The overall survival (OS) rates for gastrointestinal malignancy remain low despite advances in early diagnosis and clinical treatments over the last several decades [2]. Therefore, the identification of new biomarkers to screen out high-risk patients and predict gastrointestinal cancer prognosis is urgent.

An overwhelming number of studies have proven that Histone Deacetylase 1 (HDAC1) is tightly correlated with cancer. For example, HDAC1 has been demonstrated to be overexpressed in many cancers, such as in breast, lung and renal cell cancer, as well as in classical Hodgkin's lymphoma [3–6]. In addition, HDAC1 overexpression is often associated with poor prognosis in breast and lung cancer [3, 4]. Moreover, HDAC1 silencing by siRNA results in cell cycle arrest, cell growth inhibition, and induction of apoptosis in breast and colon cancer cells [7, 8], while HDAC1 overexpression leads to an increase in cell proliferation in prostate cancer cells [9], indicating that HDAC1 stimulates cancer cell growth. Taken

together, these findings suggest that HDAC1 may be a good diagnostic and prognostic marker for some types of cancer. However, the role of HDAC1 in the progression and prognosis of gastrointestinal malignancy is largely unknown.

In this study, we performed a systematic review and a meta-analysis to evaluate the correlation of HDAC1 expression with several types of gastrointestinal malignancy. We found that gastrointestinal cancer tissue showed higher HDAC1 expression than normal tissue, and HDAC1 expression was associated with several clinical features of gastrointestinal malignancy. Additionally, HDAC1 expression was negatively correlated with the OS rate of patients with gastrointestinal malignancies, especially gastric cancer. Overall, this study is the first to systematically review the critical role of HDAC1 in the progression and prognosis of gastrointestinal malignancy.

## RESULTS

### Study selection and characteristics of the included studies

A total of 4539 papers were retrieved using the search strategy (Figure 1). After the paper titles and abstracts were checked, 4481 studies were excluded because of their irrelevance and duplication. Then, the remaining 58 articles were viewed in their entirety. Among the 58 articles, 30 were excluded due to the following reasons: (1) western blot was used to determine HDAC1 expression; (2) the studies only focused on animal models or cell lines; or (3) relative data could not be extracted. Finally, 28 studies [8, 10–36] matched the criteria for this analysis, including 1 study concerning colorectal, gastric and esophageal cancer, 9 studies concerning only colorectal cancer, 5 studies concerning only gastric cancer, 1 study concerning only esophageal cancer, 5 studies concerning only liver cancer and 7 studies concerning only pancreatic cancer.

All characteristics of the 28 studies are listed in Table 1. Among the studies, sixteen originated from Asia, eleven from Europe and one from America. A total of 2368 cases were enrolled. An immunohistochemistry assay was used in 22 studies, whereas a real-time polymerase chain reaction (RT-PCR) assay was used in six studies. The Newcastle-Ottawa Scale (NOS) was used to assess the methodological quality of the included studies, and the results showed that all the studies had high-quality (Table 2).

### The expression level of HDAC1 in gastrointestinal cancer tissues was higher than that in noncancerous tissues

Seven studies compared the expression level of HDAC1 between gastrointestinal cancer tissues and

noncancerous tissues, including 1 study concerning colorectal, gastric and esophageal cancer, 3 studies concerning only colorectal cancer, 1 study concerning only gastric cancer, 1 study concerning only liver cancer and 1 study concerning only pancreatic cancer. The pooled odds ratio (OR) with 95% confidence interval (CI) including 390 cancer patients is shown in Figure 2 (OR = 7.40, 95% CI = 2.45–22.36,  $P = 0.0004$ ) and suggests that the HDAC1 expression level in gastrointestinal cancer tissues was higher than that in noncancerous tissues.

Sub-group analysis was then performed by cancer type. As shown in Figure 3A, the expression level of HDAC1 in colorectal cancer was higher than that in control tissue samples (OR = 10.84, 95% CI = 5.33–22.07,  $P < 0.00001$ ). There was no significant difference in HDAC1 expression levels between gastric cancer tissues and control tissues (Figure 3B), but only two studies with high heterogeneity ( $I^2 = 96\%$ ) were enrolled. Only one study investigated esophageal, liver or pancreatic cancer separately. Together, these results suggest that the expression level of HDAC1 in gastrointestinal malignancies, especially in colorectal cancer, is higher than that in noncancerous tissues.

### Correlation of HDAC1 expression with the clinical features of gastrointestinal cancer patients

We next analyzed the relationship between HDAC1 expression and the clinical features of gastrointestinal cancer patients. As shown in Figure 4, the HDAC1 expression level was higher in stage III-IV than in stage I-II gastrointestinal cancer patients (OR = 1.62, 95% CI = 1.28–2.05,  $P < 0.0001$ ). Sub-group analyses were conducted by cancer type as well. As shown in Table 3, the expression level of HDAC1 in stage III-IV was higher than that in stage I-II colorectal cancer (OR = 2.94, 95% CI = 1.50–5.77), gastric cancer (OR = 1.47, 95% CI = 1.00–2.18) and liver cancer (OR = 2.30, 95% CI = 1.38–3.85) but not pancreatic cancer (OR = 1.05, 95% CI = 0.60–1.85) and esophageal cancer (only one study).

In addition, the HDAC1 expression level was higher in patients with low-differentiated cancer than that expressed in those with moderate/high-differentiated gastrointestinal cancer (OR = 1.75, 95% CI = 1.03–2.95,  $P = 0.04$ ) (Figure 5). Sub-group analyses (Table 3) showed that the expression level of HDAC1 in the low-differentiated cancer patients was higher than that in the moderate/high-differentiated cancer patients with colorectal cancer (OR = 3.80, 95% CI = 1.46–9.92) and liver cancer (OR = 2.50, 95% CI = 1.45–4.30). However, there was no significant difference in gastric cancer (OR = 1.27, 95% CI = 0.82–1.96) and pancreatic cancer (OR = 1.54, 95% CI = 0.82–2.90). Only one study that investigated the esophageal cancer grade was included.

However, the groups positive and negative for lymph node metastasis (OR = 1.49, 95% CI = 0.85–2.61, P = 0.16) (Figure 6), as well as distant metastasis (OR = 1.67, 95% CI = 0.91–3.08, P = 0.10) (Figure 7), did not show a significant difference in HDAC1 expression in the gastrointestinal cancer patients overall. In the sub-group analyses (Table 3), we found that the HDAC1 expression level was higher in the lymph node metastasis-positive group than in the negative group with gastric cancer (OR = 1.60, 95% CI = 1.07–2.40), and the group positive for distant metastasis showed higher HDAC1 expression than the negative group in patients with colorectal cancer (OR = 3.67, 95% CI = 1.38–9.79). The other analyses showed no significant difference or were short studies (no study or only one). Collectively, these findings suggest that there are tight correlations between HDAC1 expression and the clinical features of gastrointestinal cancer patients.

### Impact of HDAC1 expression on overall survival of gastrointestinal cancer patients

Subsequently, we investigated the association between HDAC1 expression and the overall survival of gastrointestinal cancer patients. At first, we found that gastrointestinal cancer patients with low HDAC1 expression showed better overall survival than patients with high HDAC1 expression. The pooled hazard ratio (HR) with 95% CI is shown in Figure 8 (HR = 1.37, 95% CI = 1.02–1.84, P = 0.03). To determine whether HDAC1 expression was correlated with colorectal, gastric, pancreatic, esophageal or liver cancer prognosis, sub-group analyses were performed. We found that HDAC1 expression was negatively correlated with the OS rate of gastric cancer patients (HR = 1.88, 95% CI = 1.14–3.12, P = 0.01) (Figure 9B). However, the OS rate was comparable between patients with low HDAC1 expression and those

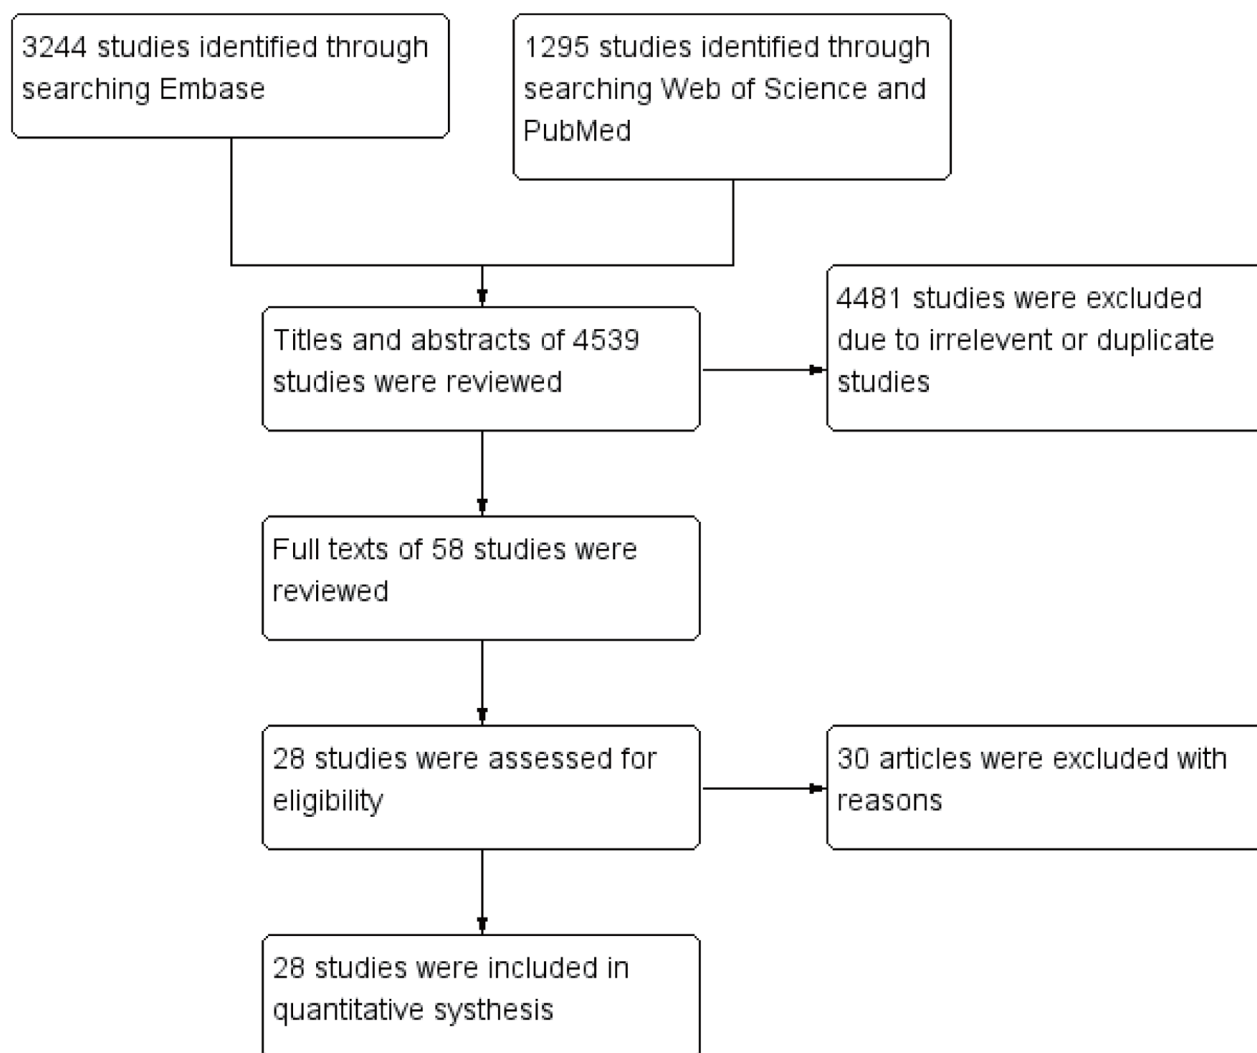

Figure 1: Methodological flow chart of study selection.

**Table 1: Main characteristics and results of the included studies**

| Study       | Year | Country     | Sample size | Age                     | Detection method | Cut-off value   | Histology   | Stage | Follow-up period (month) | Outcome              |
|-------------|------|-------------|-------------|-------------------------|------------------|-----------------|-------------|-------|--------------------------|----------------------|
| Thangaraju  | 2009 | USA         | 18          | NR                      | RT-PCR           | NR              | CRC         | NR    | NR                       | NR                   |
| Huang       | 2005 | Singapore   | 45          | NR                      | IHC              | Score $\geq 2$  | CRC         | NR    | NR                       | NR                   |
| Özdağ       | 2006 | UK          | 20          | NR                      | RT-PCR           | NR              | CRC         | NR    | NR                       | NR                   |
| Weichert-1  | 2008 | Germany     | 140         | 65.0 (median)           | IHC              | IRS > 6         | CRC         | I-IV  | 64 months (median)       | OS                   |
| Benard      | 2015 | Netherlands | 254         | NR                      | IHC              | >Median         | CRC         | I-III | 103.2 months (mean)      | OS, DSS, DRFS, LRRFS |
| Mimori      | 2005 | Japan       | 61          | NR                      | RT-PCR           | T/N ratio >1.65 | CRC         | NR    | NR                       | OS                   |
| Ishihama    | 2007 | Japan       | 64          | NR                      | IHC              | SI >10.7        | CRC         | I-IV  | 72 months                | OS                   |
| Higashijima | 2011 | Japan       | 74          | 67.3 (mean)             | IHC              | >10%            | CRC         | I-IV  | NR                       | OS, DFS              |
| Liu         | 2010 | China       | 94          | NR                      | IHC              | SI $\geq 23$    | CRC         | I-IV  | 60 months                | OS                   |
| Nakagawa    | 2007 | Japan       | 20          | NR                      | IHC              | Score $\geq 3$  | CRC, EC, GC | NR    | NR                       | NR                   |
| Giaginis    | 2015 | Greece      | 70          | 66.77 $\pm$ 8.94 (mean) | IHC              | Score $\geq 3$  | PC          | I-IV  | 21 months                | OS                   |
| Ouai'ssi    | 2008 | France      | 11          | NR                      | RT-PCR           | NR              | PC          | I-IV  | NR                       | NR                   |
| Lehmann     | 2009 | Germany     | 81          | 66.0 (median)           | IHC              | IRS > 6         | PC          | I-IV  | NR                       | OS                   |
| Wang        | 2009 | China       | 54          | 57.6 (mean)             | IHC              | >Median         | PC          | I-IV  | NR                       | OS                   |
| Miyake      | 2008 | Japan       | 39          | 64.4 (mean)             | IHC              | $\geq 10\%$     | PC          | I-IV  | NR                       | OS                   |
| Gao         | 2010 | China       | 30          | 59.36 (mean)            | IHC              | $\geq$ Mean     | PC          | I-III | NR                       | NR                   |
| Ouai'ssi    | 2014 | France      | 11          | NR                      | RT-PCR           | NR              | PC          | NR    | 16 months (mean)         | OS, DFS              |
| Langer      | 2010 | Germany     | 126         | NR                      | IHC              | SI > 6          | EC          | I-IV  | NR                       | NR                   |
| Ler         | 2015 | Singapore   | 156         | 58.16 (mean)            | IHC              | Score $\geq 1$  | LC          | I-IV  | 120 months               | NR                   |
| Morine      | 2012 | Japan       | 35          | 68 (mean)               | IHC              | $\geq 10\%$     | LC          | I-IV  | 27.0 months (mean)       | OS, DFS              |
| Quint       | 2011 | Germany     | 170         | 61.7Z $\pm$ 11.2 (mean) | IHC              | >Median         | LC          | I-IV  | NR                       | OS                   |
| Wu          | 2010 | China       | 43          | NR                      | IHC              | IRS > 6         | LC          | NR    | NR                       | RFS                  |
| Rikimaru    | 2007 | Japan       | 47          | 65.3 (mean)             | IHC              | >Mean           | LC          | I-IV  | NR                       | OS                   |

(Continued)

| Study      | Year | Country | Sample size | Age         | Detection method | Cut-off value             | Histology | Stage | Follow-up period (month) | Outcome |
|------------|------|---------|-------------|-------------|------------------|---------------------------|-----------|-------|--------------------------|---------|
| Weichert-2 | 2008 | Germany | 293         | NR          | IHC              | IRS > 6                   | GC        | I-IV  | NR                       | OS      |
| Yu         | 2015 | China   | 80          | 54.4 (mean) | IHC              | Mean density $\geq$ 1.205 | GC        | I-IV  | NR                       | OS      |
| Mutze      | 2010 | Germany | 127         | 59.9 (mean) | IHC              | SI > 6                    | GC        | I-IV  | 52.8 months (median)     | OS      |
| Gao        | 2012 | China   | 65          | 65.0 (mean) | IHC              | SI > 3                    | GC        | I-IV  | NR                       | NR      |
| Sudo       | 2011 | Japan   | 140         | 67.1 (mean) | RT-PCR           | $\geq$ Mean               | GC        | I-IV  | NR                       | OS      |

NR, no reported; IHC, immunohistochemistry; RT-PCR, real-time polymerase chain reaction; IRS, immunoreactivity scoring; SI, staining index; T/N, tumour/normal; CRC, colorectal cancer; EC, esophagus cancer; GC, gastric cancer; PC, pancreatic cancer; LC, liver cancer; OS, overall survival; DFS, disease-free survival; RFS, recurrence-free survival; DRFS, distant recurrence-free survival; LRRFS, loco-regional recurrence-free survival; DSS, disease-specific survival.

with high HDAC1 expression in colorectal cancer (HR = 0.87, 95% CI = 0.66–1.13, P = 0.30) (Figure 9A), liver cancer (HR = 1.71, 95% CI = 0.76–3.86, P = 0.19) (Figure 9C) and pancreatic cancer (HR = 1.43, 95% CI = 0.71–2.88, P = 0.32) (Figure 9D). No study analyzed the overall survival of esophageal cancer patients. Therefore, these findings indicate that patients with low HDAC1 expression show better overall survival than those with high HDAC1 expression in gastrointestinal malignancies, especially gastric cancer.

### Sensitivity analysis and publication bias

Sensitivity analyses were performed by omitting a study at a time. The results were not significantly changed,

indicating the stability of the present analyses. The funnel plots were almost symmetric, suggesting that there were no significant publication biases in these meta-analyses (Supplementary Figures 1–6).

## DISCUSSION

In our study, a combined analysis of 28 eligible clinical studies revealed a critical role of HDAC1 expression in gastrointestinal cancer progression and prognosis. The meta-analysis results suggested that the expression of HDAC1 in gastrointestinal cancer tissues, especially colorectal cancer tissue, is higher than that in noncancerous tissues. In addition, we performed meta-analyses to determine the relationship between HDAC1

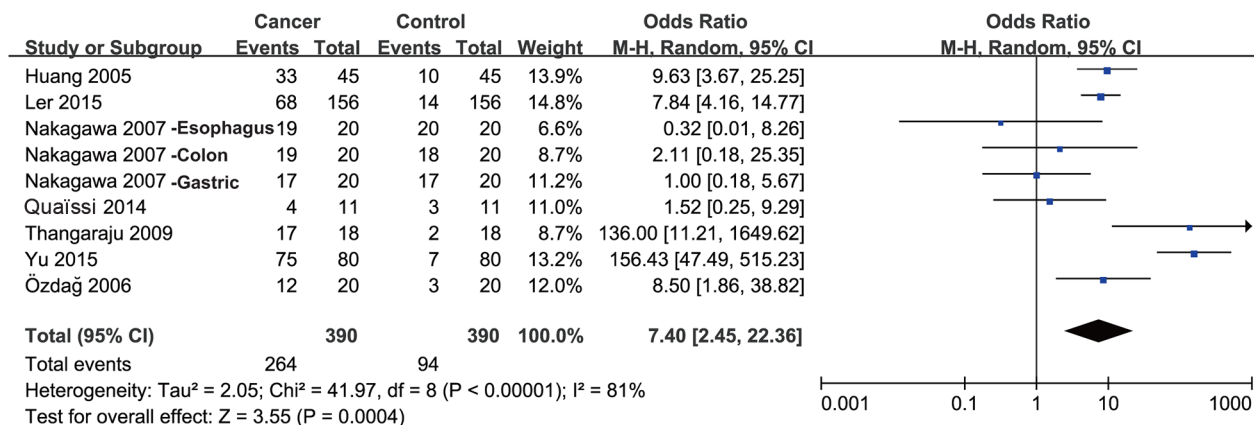

**Figure 2: Forest plot of odds ratio (OR).** Relative HDAC1 abundance of overall gastrointestinal malignancy in comparison to noncancerous tissues.

**Table 2: Newcastle-Ottawa Scale for each included study**

| Study            | Selection | Comparability | Exposure | Total quality score |
|------------------|-----------|---------------|----------|---------------------|
| Thangaraju 2009  | 3         | 2             | 3        | 8                   |
| Huang 2005       | 4         | 2             | 3        | 9                   |
| Özdağ 2006       | 3         | 0             | 3        | 6                   |
| Benard 2015      | 4         | 0             | 3        | 7                   |
| Mimori 2005      | 3         | 2             | 3        | 8                   |
| Ishihama 2007    | 3         | 2             | 3        | 8                   |
| Higashijima 2011 | 3         | 2             | 3        | 8                   |
| Nakagawa 2007    | 3         | 2             | 3        | 8                   |
| Langer 2010      | 3         | 2             | 3        | 8                   |
| Weichert-1 2008  | 3         | 0             | 3        | 6                   |
| Liu 2010         | 3         | 0             | 3        | 6                   |
| Giaginis 2015    | 3         | 2             | 3        | 8                   |
| Lehmann 2009     | 3         | 2             | 3        | 8                   |
| Wang 2009        | 3         | 2             | 3        | 8                   |
| Miyake 2008      | 3         | 2             | 3        | 8                   |
| Quaïssi 2014     | 3         | 2             | 3        | 8                   |
| Gao 2010         | 3         | 0             | 3        | 6                   |
| Quaïssi 2008     | 2         | 1             | 3        | 6                   |
| Ler 2015         | 3         | 2             | 3        | 8                   |
| Morine 2012      | 3         | 2             | 3        | 8                   |
| Quint 2011       | 3         | 2             | 3        | 8                   |
| Wu 2010          | 3         | 2             | 3        | 8                   |
| Rikimaru 2007    | 3         | 2             | 2        | 7                   |
| Weichert-2 2008  | 3         | 2             | 3        | 8                   |
| Yu 2015          | 3         | 2             | 3        | 8                   |
| Mutze 2010       | 4         | 2             | 3        | 9                   |
| Gao 2012         | 3         | 2             | 3        | 8                   |
| Sudo 2011        | 3         | 2             | 3        | 8                   |

expression and the clinical features of gastrointestinal malignancies, and correlations between HDAC1 expression and tumor stage, grade, lymph node metastasis and distant metastasis were observed. Finally, we found that gastrointestinal cancer patients with low HDAC1 expression showed better OS than those with high HDAC1 expression, especially with gastric cancer.

HDAC1 expression in gastrointestinal malignancies is controversial. For example, in several studies HDAC1 overexpression was detected in over 54% of gastric cancer tissues in both mRNA and protein levels [16, 17, 37], but

another study [38] found that HDAC1 was downregulated in gastric tumors compared with the level in adjacent non-tumors. Additionally, the HDAC1 expression level has been reported to be increased in colorectal cancer tissue as compared to normal tissue [21], but there was no significant difference between colorectal cancer and normal tissue in another study [11]. In this analysis, we found that HDAC1 expression in colorectal cancer tissues is higher than that in normal tissues. Much more work needs to be done for other types of gastrointestinal cancer.

**Table 3: Sub-group analyses were stratified on the basis of histology**

|                   | Stage |                   | Grade |                   | Lymph node metastasis |                    | Distant metastasis |                   |
|-------------------|-------|-------------------|-------|-------------------|-----------------------|--------------------|--------------------|-------------------|
|                   | N     | OR (95%CI)        | N     | OR (95%CI)        | N                     | OR (95%CI)         | N                  | OR (95%CI)        |
| Colorectal cancer | 2     | 2.94 (1.50, 5.77) | 2     | 3.80 (1.46, 9.92) | 2                     | 1.50 (0.83, 2.71)  | 2                  | 3.67 (1.38, 9.79) |
| Gastric cancer    | 4     | 1.47 (1.00, 2.18) | 3     | 1.27 (0.82, 1.96) | 4                     | 1.60 (1.07, 2.40)  | 1                  | 0.95 (0.34, 2.61) |
| Esophagus cancer  | 1     | 1.07 (0.52, 2.20) | 1     | 0.49 (0.24, 1.00) | 1                     | 0.64 (0.31, 1.29)  | None               | None              |
| Liver cancer      | 4     | 2.30 (1.38, 3.85) | 5     | 2.50 (1.45, 4.30) | 1                     | 6.60 (1.18, 37.03) | None               | None              |
| Pancreatic cancer | 5     | 1.05 (0.60, 1.85) | 5     | 1.54 (0.82, 2.90) | 4                     | 1.08 (0.62, 1.88)  | 2                  | 0.80 (0.19, 3.33) |

N, study numbers.

In this analysis, correlations between HDAC1 expression and tumor stage, tumor grade, lymph node metastasis or distant metastasis were observed in gastrointestinal malignancies, indicating that HDAC1 might

be a good biomarker to distinguish different stages, grades, and states of lymph node metastasis or distant metastasis and would be beneficial for the diagnosis of gastrointestinal malignancy. Although there was no correlation between

**A**

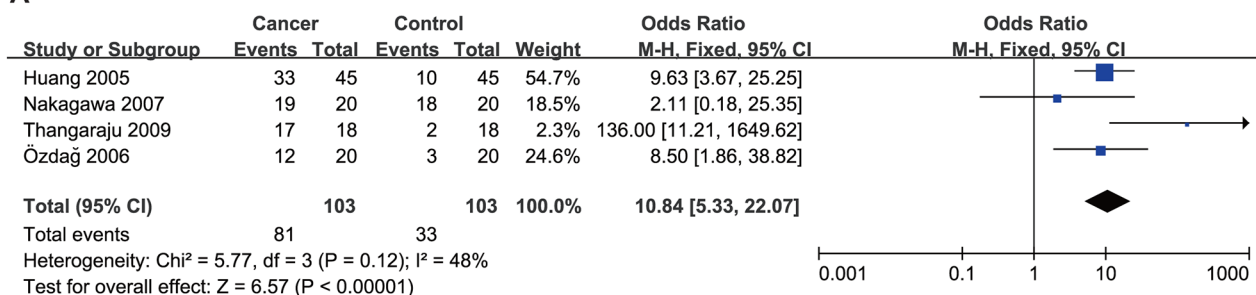

**B**

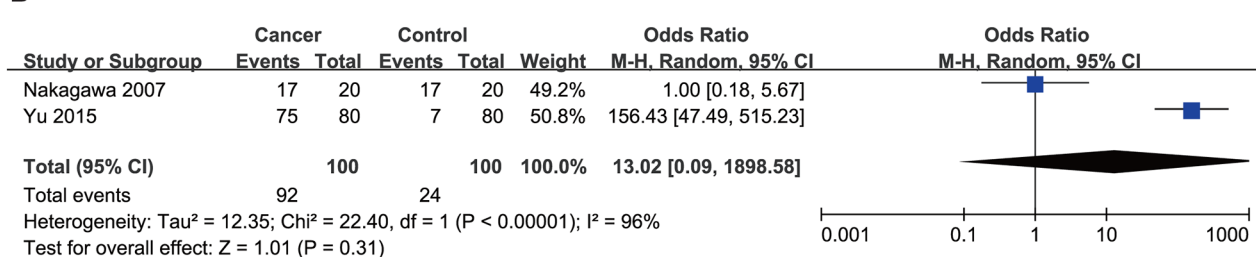

**Figure 3: Forest plot of odds ratio (OR).** (A) Comparison of the expression level of HDAC1 between colorectal cancer tissues and normal tissues. (B) Comparison of the expression level of HDAC1 between gastric cancer tissues and normal tissues.

HDAC1 expression and OS of colorectal cancer, liver cancer and pancreatic cancer patients, we found that gastric cancer patients with low HDAC1 expression showed better OS than those with high HDAC1 expression, indicating that HDAC1 might be a good prognostic marker for gastric cancer patients and could help screen out high-risk patients with gastric cancer.

This study has several limitations. First, the cut-off value to determine positive or negative expression of HDAC1 varied across the included studies. Second, the number of cohorts included for some analyses was insufficient, making the results less convincing. Therefore, the role of HDAC1 expression in gastrointestinal cancer progression and prognosis warrants further study.

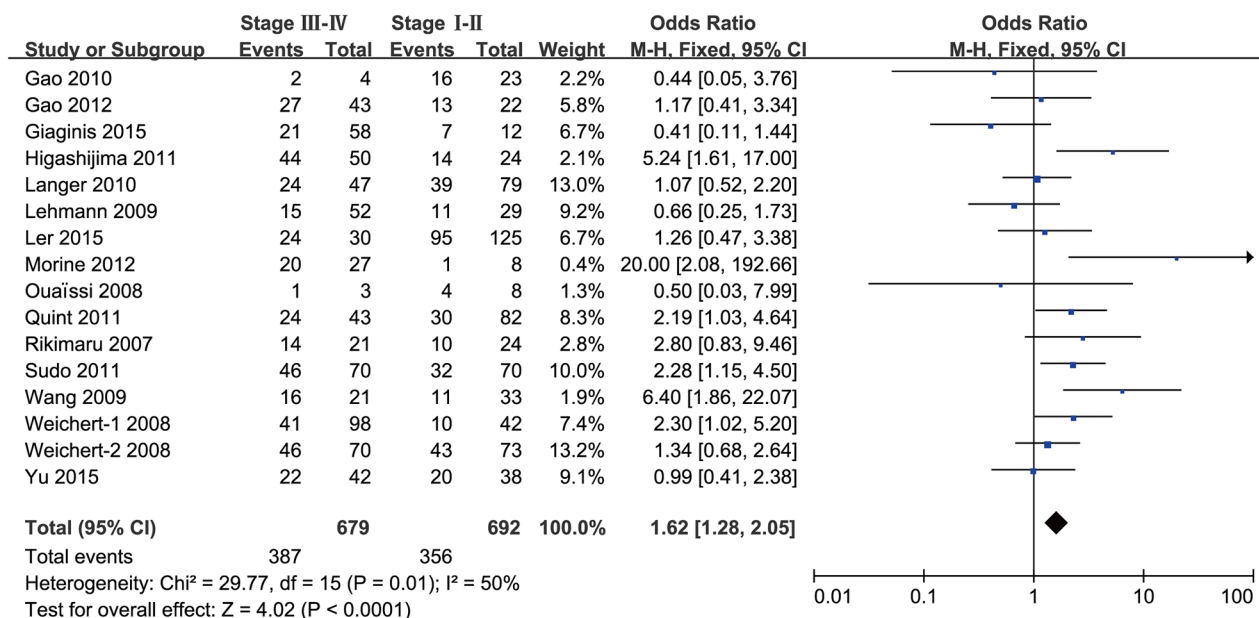

**Figure 4: Forest plot of odds ratio (OR).** Association between HDAC1 expression and tumor stage in overall gastrointestinal malignancy.

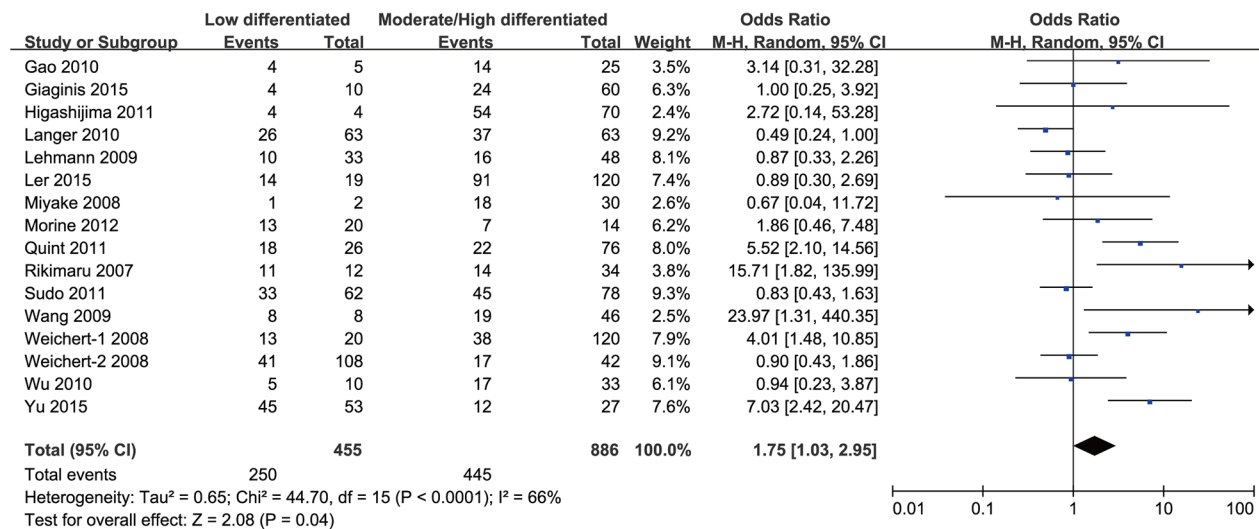

**Figure 5: Forest plot of odds ratio (OR).** Association between HDAC1 expression and tumor grade in overall gastrointestinal malignancy.



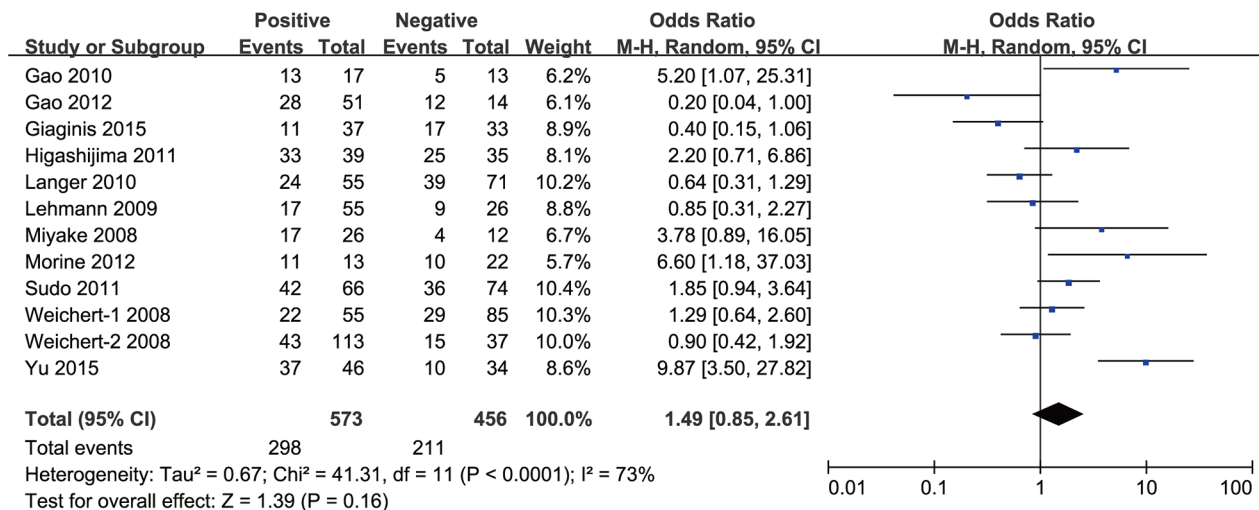

**Figure 6: Forest plot of odds ratio (OR).** Association between HDAC1 expression and lymph node metastasis in overall gastrointestinal malignancy.

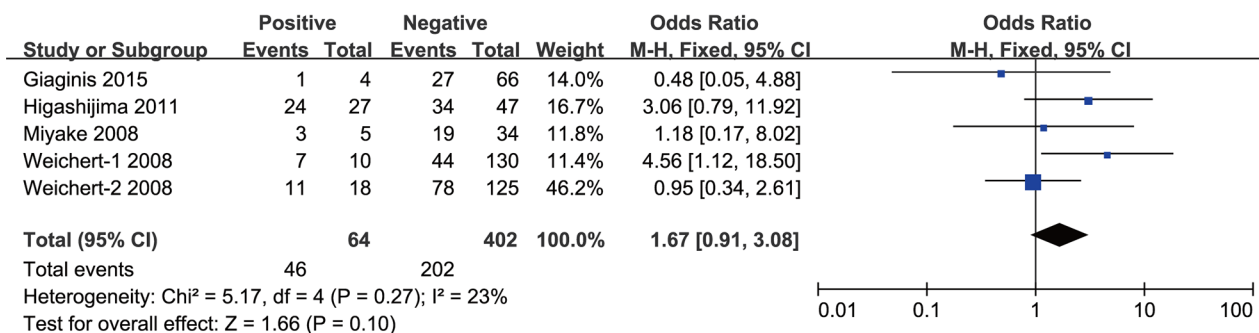

**Figure 7: Forest plot of odds ratio (OR).** Association between HDAC1 expression and distant metastasis in overall gastrointestinal malignancy.

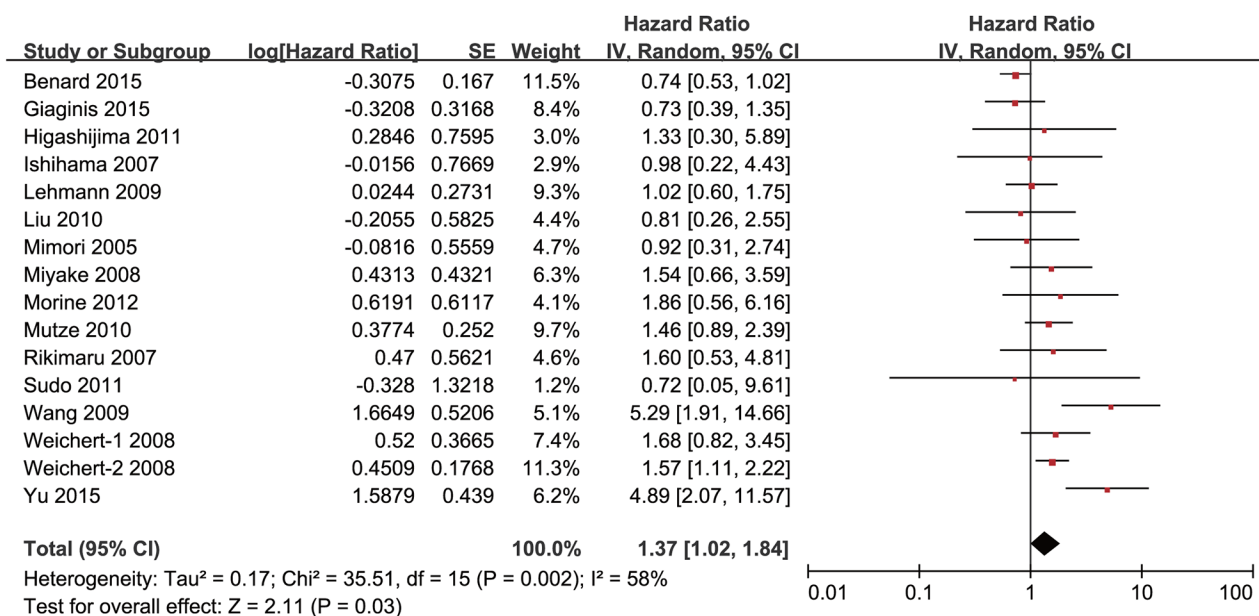

**Figure 8: Forest plot of hazard ratio (HR).** Association between HDAC1 expression and the OS of overall gastrointestinal cancer patients.

HDAC1 has been served as a target for cancer therapy, and small molecule HDAC inhibitors have been used in clinical treatment of patients with several types of cancer, such as T-cell lymphoma and multiple myeloma currently. Consistent with this, the present

analysis revealed the important clinical value of HDAC1 expression in gastrointestinal malignancy. In conclusion, HDAC1 expression might be a good biomarker for the diagnosis and prognosis of gastrointestinal cancer patients.

**A**

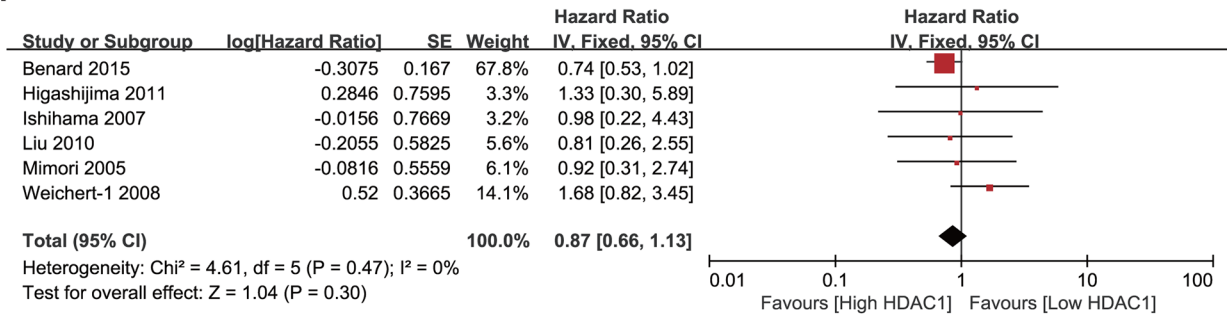

**B**

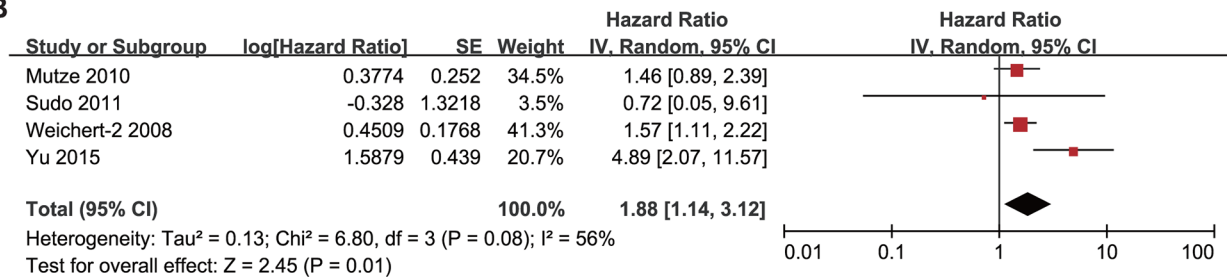

**C**

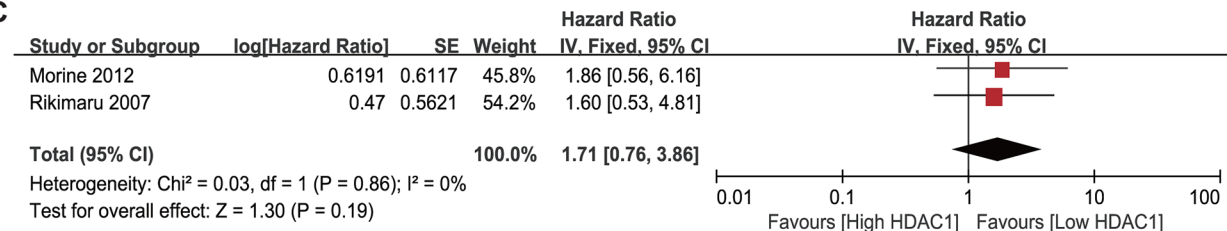

**D**

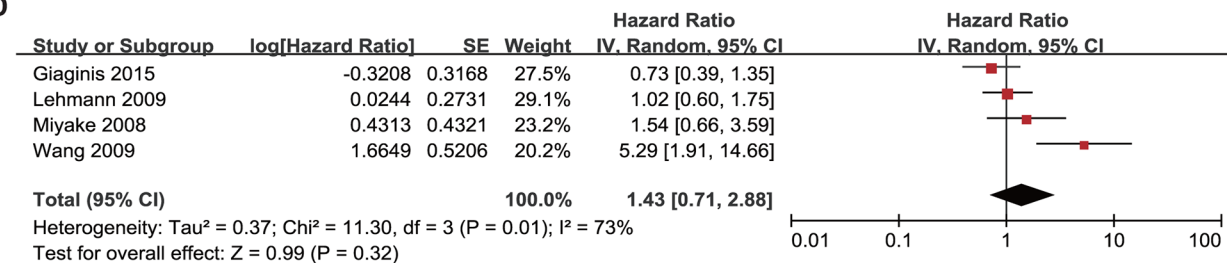

**Figure 9: Forest plot of hazard ratio (HR).** Association between HDAC1 expression and the OS of colorectal cancer (A), gastric cancer (B), liver cancer (C) and pancreatic cancer (D) patients.

## MATERIALS AND METHODS

### Search strategy and eligibility criteria

A systematic literature search was conducted for original articles analyzing the correlation between HDAC1 expression and the progression and prognosis of several types of gastrointestinal malignancy in PubMed, Embase and Web of Science. Studies were selected using the following keywords: “HDAC1” or “Histone Deacetylase 1” for HDAC1; “CRC”, “colorectal cancer” or “colorectal carcinoma” for colorectal cancer; “gastric cancer”, “gastric neoplasm”, “stomach cancer” or “stomach neoplasm” for gastric cancer; “esophagus cancer” or “esophageal neoplasm” for esophageal cancer; “hepatocellular cancer”, “hepatocellular carcinoma” or “liver cancer” for liver cancer; and “pancreatic cancer” or “pancreatic neoplasm” for pancreatic cancer. The search ended on November 20th, 2016, and no lower date limit was used. No language restriction was applied, and the references of the relevant studies were also screened to check for potentially relevant articles.

The full text of each relevant study was carefully evaluated. The studies collected in the present meta-analysis were required to meet the following criteria: (1) HDAC1 expression was measured by PCR or immunohistochemistry; (2) the clinical features or prognosis of gastrointestinal malignancy were investigated; and (3) the correlation of HDAC1 expression with clinical features and survival outcomes was analyzed. When several studies collected data from the same patient group, the most recent study was used; if the most recent study did not meet the inclusion criteria, the highest quality study was used. Articles were excluded if (1) they were case reports, letters, or reviews without original data; (2) they focused on animal models or cancer cells; (3) the expression of HDAC1 was determined by western blot; or (4) the full text was unavailable. All evaluations were independently performed by two authors, Lin-Lin Cao and Zhihong Yue, to ensure the accurate inclusion of studies. Disagreement between the two authors was resolved by reaching a consensus in accordance with the original article.

### Data extraction

Two authors, Lin-Lin Cao and Zhihong Yue, independently extracted data from the eligible studies. The following information was extracted from each included study: first author’s name, publication year, country, sample size, age, HDAC1 detection method, the cut-off value, histology, stage, follow-up period and outcome. If there were no original data for HDAC1 expression and only a histogram was provided, we used Engauge Digitizer 4.1 (<http://digitizer.sourceforge.net>) to extract the expression data. If the cut-off value of HDAC1 expression was not provided, the mean value of all samples was considered to be the cut-off value. In addition, if hazard

ratios (HRs) for overall survival (OS) rates according to HDAC1 expression were not reported directly, the number of deaths and total samples in each article were extracted for HR calculation. If only the Kaplan–Meier curves were available, the survival data were extracted using Engauge Digitizer 4.1 and analyzed as described previously [39].

### Quality score assessment

Two reviewers (Lin-Lin Cao and Zhihong Yue) independently assessed the quality of the included studies according to the Newcastle-Ottawa Scale (NOS) ([http://www.ohri.ca/programs/clinical\\_epidemiology/oxford.asp](http://www.ohri.ca/programs/clinical_epidemiology/oxford.asp)). The scale consists of three components related to sample selection, comparability and ascertainment of exposure.

### Statistical analysis

Analysis was conducted using Review Manager 5.3 (Cochrane Collaboration, Oxford, UK). The ORs with 95% CIs were used to compare the HDAC1 expression level of cancer tissues with that of noncancerous tissues and to analyze the association between the expression level of HDAC1 and clinical features of gastrointestinal malignancy. HRs with 95% CIs were used to evaluate the correlation of HDAC1 expression with the overall survival of gastrointestinal cancer patients. The random-effect model was applied when  $I^2 > 50\%$ , and the fixed-effect model was used in the absence of between-study heterogeneity ( $I^2 \leq 50\%$ ). P values of  $<0.05$  were considered to be statistically significant. Publication bias was evaluated using the funnel plot.

## ACKNOWLEDGMENTS

We thank all of the group members for helpful discussions. This work was supported by Beijing Natural Science Foundation grant 7164305.

## CONFLICTS OF INTEREST

The authors have declared that no conflicts of interest exist.

## REFERENCES

1. Ferlay J, Soerjomataram I, Dikshit R, Eser S, Mathers C, Rebelo M, Parkin DM, Forman D, Bray F. Cancer incidence and mortality worldwide: sources, methods and major patterns in GLOBOCAN 2012. *Int J Cancer*. 2015; 136: E359-86. doi: 10.1002/ijc.29210.
2. Crew KD, Neugut AI. Epidemiology of gastric cancer. *World J Gastroenterol*. 2006; 12: 354-62.
3. Minamiya Y, Ono T, Saito H, Takahashi N, Ito M, Mitsui M, Motoyama S, Ogawa J. Expression of histone deacetylase

- 1 correlates with a poor prognosis in patients with adenocarcinoma of the lung. *Lung Cancer*. 2011; 74: 300-4. doi: 10.1016/j.lungcan.2011.02.019.
4. Zhang Z, Yamashita H, Toyama T, Sugiura H, Ando Y, Mita K, Hamaguchi M, Hara Y, Kobayashi S, Iwase H. Quantitation of HDAC1 mRNA expression in invasive carcinoma of the breast\*. *Breast Cancer Res Treat*. 2005; 94: 11-6. doi: 10.1007/s10549-005-6001-1.
  5. Adams H, Fritzsche FR, Dirnhofner S, Kristiansen G, Tzankov A. Class I histone deacetylases 1, 2 and 3 are highly expressed in classical Hodgkin's lymphoma. *Expert Opin Ther Targets*. 2010; 14: 577-84. doi: 10.1517/14728221003796609.
  6. Fritzsche FR, Weichert W, Roske A, Gekeler V, Beckers T, Stephan C, Jung K, Scholman K, Denkert C, Dietel M, Kristiansen G. Class I histone deacetylases 1, 2 and 3 are highly expressed in renal cell cancer. *BMC Cancer*. 2008; 8: 381. doi: 10.1186/1471-2407-8-381.
  7. Senese S, Zaragoza K, Minardi S, Muradore I, Ronzoni S, Passafaro A, Bernard L, Draetta GF, Alcalay M, Seiser C, Chiocca S. Role for histone deacetylase 1 in human tumor cell proliferation. *Mol Cell Biol*. 2007; 27: 4784-95. doi: 10.1128/MCB.00494-07.
  8. Weichert W, Roske A, Niesporek S, Noske A, Buckendahl AC, Dietel M, Gekeler V, Boehm M, Beckers T, Denkert C. Class I histone deacetylase expression has independent prognostic impact in human colorectal cancer: specific role of class I histone deacetylases *in vitro* and *in vivo*. *Clin Cancer Res*. 2008; 14: 1669-77. doi: 10.1158/1078-0432.CCR-07-0990.
  9. Halkidou K, Gaughan L, Cook S, Leung HY, Neal DE, Robson CN. Upregulation and nuclear recruitment of HDAC1 in hormone refractory prostate cancer. *Prostate*. 2004; 59: 177-89. doi: 10.1002/pros.20022.
  10. Mimori K, Ogawa K, Okamoto M, Sudo T, Inoue H, Mori M. Clinical significance of enhancer of zeste homolog 2 expression in colorectal cancer cases. *Eur J Surg Oncol*. 2005; 31: 376-80. doi: 10.1016/j.ejso.2004.11.001.
  11. Benard A, Goossens-Beumer IJ, van Hoesel AQ, Horati H, de Graaf W, Putter H, Zeestraten EC, Liefers GJ, van de Velde CJ, Kuppen PJ. Nuclear expression of histone deacetylases and their histone modifications predicts clinical outcome in colorectal cancer. *Histopathology*. 2015; 66: 270-82. doi: 10.1111/his.12534.
  12. Ishihama K, Yamakawa M, Semba S, Takeda H, Kawata S, Kimura S, Kimura W. Expression of HDAC1 and CBP/p300 in human colorectal carcinomas. *J Clin Pathol*. 2007; 60: 1205-10. doi: 10.1136/jcp.2005.029165.
  13. Higashijima J, Kurita N, Miyatani T, Yoshikawa K, Morimoto S, Nishioka M, Iwata T, Shimada M. Expression of histone deacetylase 1 and metastasis-associated protein 1 as prognostic factors in colon cancer. *Oncol Rep*. 2011; 26: 343-8. doi: 10.3892/or.2011.1312.
  14. Liu TQ, Wei MJ. Clinical pathological significance of expression of histone deacetylase 1 and 2 in colorectal adenoma and carcinoma. *World Chinese Journal of Digestology*. 2010; 18: 3195-9.
  15. Weichert W, Roske A, Gekeler V, Beckers T, Ebert MP, Pross M, Dietel M, Denkert C, Rocken C. Association of patterns of class I histone deacetylase expression with patient prognosis in gastric cancer: a retrospective analysis. *Lancet Oncol*. 2008; 9: 139-48. doi: 10.1016/S1470-2045(08)70004-4.
  16. Mutze K, Langer R, Becker K, Ott K, Novotny A, Lubner B, Hapfelmeier A, Gottlicher M, Hofler H, Keller G. Histone deacetylase (HDAC) 1 and 2 expression and chemotherapy in gastric cancer. *Ann Surg Oncol*. 2010; 17: 3336-43. doi: 10.1245/s10434-010-1182-1.
  17. Yu SY, Hou XL, Duan XW, Yan HZ, Liu W, Tang J. Significance of expression of HDAC1 protein in gastric cancer. *World Chinese Journal of Digestology*. 2015; 23: 5290-5.
  18. Morine Y, Shimada M, Iwahashi S, Utsunomiya T, Imura S, Ikemoto T, Mori H, Hanaoka J, Miyake H. Role of histone deacetylase expression in intrahepatic cholangiocarcinoma. *Surgery*. 2012; 151: 412-9. doi: 10.1016/j.surg.2011.07.038.
  19. Rikimaru T, Taketomi A, Yamashita Y, Shirabe K, Hamatsu T, Shimada M, Maehara Y. Clinical significance of histone deacetylase 1 expression in patients with hepatocellular carcinoma. *Oncology*. 2007; 72: 69-74. doi: 10.1159/000111106.
  20. Ouaisi M, Sielezneck I, Silvestre R, Sastre B, Bernard JP, Lafontaine JS, Payan MJ, Dahan L, Pirro N, Seitz JF, Mas E, Lombardo D, Ouaisi A. High histone deacetylase 7 (HDAC7) expression is significantly associated with adenocarcinomas of the pancreas. *Ann Surg Oncol*. 2008; 15: 2318-28. doi: 10.1245/s10434-008-9940-z.
  21. Thangaraju M, Carswell KN, Prasad PD, Ganapathy V. Colon cancer cells maintain low levels of pyruvate to avoid cell death caused by inhibition of HDAC1/HDAC3. *Biochem J*. 2009; 417: 379-89. doi: 10.1042/BJ20081132.
  22. Lehmann A, Denkert C, Budczies J, Buckendahl AC, Darb-Esfahani S, Noske A, Muller BM, Bahra M, Neuhaus P, Dietel M, Kristiansen G, Weichert W. High class I HDAC activity and expression are associated with RelA/p65 activation in pancreatic cancer *in vitro* and *in vivo*. *BMC Cancer*. 2009; 9: 395. doi: 10.1186/1471-2407-9-395.
  23. Giaginis C, Damaskos C, Koutsounas I, Zizi-Serbetzoglou A, Tsoukalas N, Patsouris E, Kouraklis G, Theocharis S. Histone deacetylase (HDAC)-1, -2, -4 and -6 expression in human pancreatic adenocarcinoma: associations with clinicopathological parameters, tumor proliferative capacity and patients' survival. *BMC Gastroenterol*. 2015; 15: 148. doi: 10.1186/s12876-015-0379-y.
  24. Ozdag H, Teschendorff AE, Ahmed AA, Hyland SJ, Blenkiron C, Bobrow L, Veerakumarasivam A, Burt G, Subkhankulova T, Arends MJ, Collins VP, Bowtell D, Kouzarides T, et al. Differential expression of selected histone modifier genes in human solid cancers. *BMC Genomics*. 2006; 7: 90. doi: 10.1186/1471-2164-7-90.
  25. Huang BH, Laban M, Leung CH, Lee L, Lee CK, Salto-Tellez M, Raju GC, Hooi SC. Inhibition of histone

- deacetylase 2 increases apoptosis and p21Cip1/WAF1 expression, independent of histone deacetylase 1. *Cell Death Differ.* 2005; 12: 395-404. doi: 10.1038/sj.cdd.4401567.
26. Gao F, Lv Y, Zhu Y, Chen M, Shen S, Cao J, Zou X. Correlation of epigenetic aberrance with STAT3 signaling pathway in gastric carcinogenesis. *Dig Dis Sci.* 2012; 57: 2055-62. doi: 10.1007/s10620-012-2152-1.
  27. Langer R, Mutze K, Becker K, Feith M, Ott K, Hofler H, Keller G. Expression of class I histone deacetylases (HDAC1 and HDAC2) in oesophageal adenocarcinomas: an immunohistochemical study. *J Clin Pathol.* 2010; 63: 994-8. doi: 10.1136/jcp.2010.080952.
  28. Ler SY, Leung CH, Khin LW, Lu GD, Salto-Tellez M, Hartman M, Iau PT, Yap CT, Hooi SC. HDAC1 and HDAC2 independently predict mortality in hepatocellular carcinoma by a competing risk regression model in a Southeast Asian population. *Oncol Rep.* 2015; 34: 2238-50. doi: 10.3892/or.2015.4263.
  29. Nakagawa M, Oda Y, Eguchi T, Aishima S, Yao T, Hosoi F, Basaki Y, Ono M, Kuwano M, Tanaka M, Tsuneyoshi M. Expression profile of class I histone deacetylases in human cancer tissues. *Oncol Rep.* 2007; 18: 769-74.
  30. Sudo T, Mimori K, Nishida N, Kogo R, Iwaya T, Tanaka F, Shibata K, Fujita H, Shirouzu K, Mori M. Histone deacetylase 1 expression in gastric cancer. *Oncol Rep.* 2011; 26: 777-82. doi: 10.3892/or.2011.1361.
  31. Wang W, Gao J, Man XH, Li ZS, Gong YF. Significance of DNA methyltransferase-1 and histone deacetylase-1 in pancreatic cancer. *Oncol Rep.* 2009; 21: 1439-47.
  32. Gao DJ, Xu M, Zhang YQ, Du YQ, Gao J, Gong YF, Man XH, Wu HY, Jin J, Xu GM, Li ZS. Upregulated histone deacetylase 1 expression in pancreatic ductal adenocarcinoma and specific siRNA inhibits the growth of cancer cells. *Pancreas.* 2010; 39: 994-1001. doi: 10.1097/MPA.0b013e3181db0086.
  33. Miyake K, Yoshizumi T, Imura S, Sugimoto K, Batmunkh E, Kanemura H, Morine Y, Shimada M. Expression of hypoxia-inducible factor-1alpha, histone deacetylase 1, and metastasis-associated protein 1 in pancreatic carcinoma: correlation with poor prognosis with possible regulation. *Pancreas.* 2008; 36: e1-9. doi: 10.1097/MPA.0b013e31815f2c2a.
  34. Ouaisi M, Silvy F, Loncle C, Ferraz da Silva D, Martins Abreu C, Martinez E, Berthezene P, Cadra S, Le Treut YP, Hardwigsen J, Sastre B, Sielezneff I, Benkoel L, et al. Further characterization of HDAC and SIRT gene expression patterns in pancreatic cancer and their relation to disease outcome. *PLoS One.* 2014; 9: e108520. doi: 10.1371/journal.pone.0108520.
  35. Wu LM, Yang Z, Zhou L, Zhang F, Xie HY, Feng XW, Wu J, Zheng SS. Identification of histone deacetylase 3 as a biomarker for tumor recurrence following liver transplantation in HBV-associated hepatocellular carcinoma. *PLoS One.* 2010; 5: e14460. doi: 10.1371/journal.pone.0014460.
  36. Quint K, Agaimy A, Di Fazio P, Montalbano R, Steindorf C, Jung R, Hellerbrand C, Hartmann A, Sitter H, Neureiter D, Ocker M. Clinical significance of histone deacetylases 1, 2, 3, and 7: HDAC2 is an independent predictor of survival in HCC. *Virchows Arch.* 2011; 459: 129-39. doi: 10.1007/s00428-011-1103-0.
  37. Choi JH, Kwon HJ, Yoon BI, Kim JH, Han SU, Joo HJ, Kim DY. Expression profile of histone deacetylase 1 in gastric cancer tissues. *Jpn J Cancer Res.* 2001; 92: 1300-4.
  38. Wisnieski F, Calcagno DQ, Leal MF, Chen ES, Gigeck CO, Santos LC, Pontes TB, Rasmussen LT, Payao SL, Assumpcao PP, Lourenco LG, Demachki S, Artigiani R, et al. Differential expression of histone deacetylase and acetyltransferase genes in gastric cancer and their modulation by trichostatin A. *Tumour Biol.* 2014; 35: 6373-81. doi: 10.1007/s13277-014-1841-0.
  39. Tierney JF, Stewart LA, Ghersi D, Burdett S, Sydes MR. Practical methods for incorporating summary time-to-event data into meta-analysis. *Trials.* 2007; 8: 16. doi: 10.1186/1745-6215-8-16.
