# Supplementary material for: The expression of histone deacetylase HDAC1 correlates with the progression and prognosis of gastrointestinal malignancy
Source: PubMed Central journal article supplement (PMC5503610; doi:10.18632/oncotarget.16843), 2017-04-05
Supplement: oncotarget-08-39241-s001.pdf [file oncotarget-08-39241-s001.pdf]

# The expression of histone deacetylase HDAC1 correlates with the progression and prognosis of gastrointestinal malignancy

## SUPPLEMENTARY MATERIALS

### SUPPLEMENTARY FIGURES

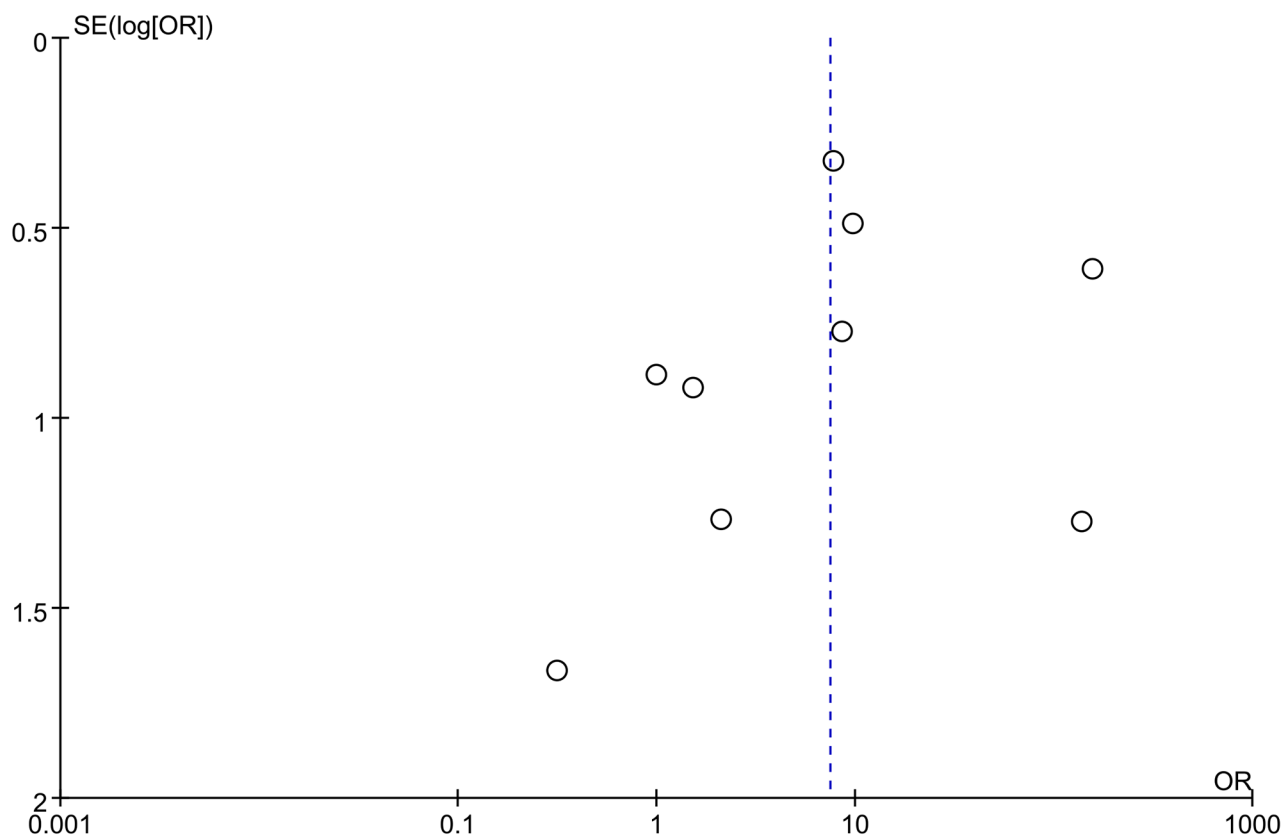

Supplementary Figure 1: Funnel plots of publication bias in the meta-analysis as shown in Figure 2.

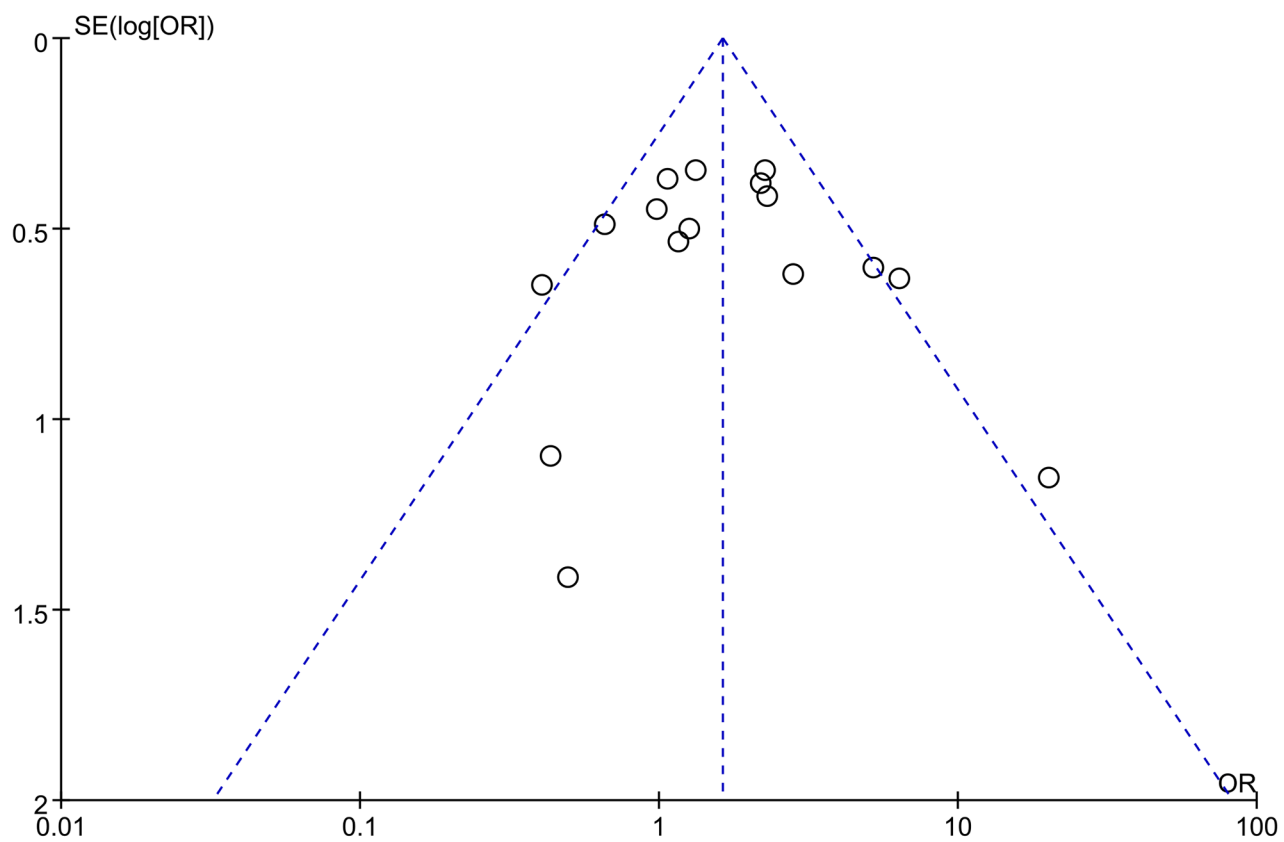

Supplementary Figure 2: Funnel plots of publication bias in the meta-analysis of HDAC1 expression and tumor stage.

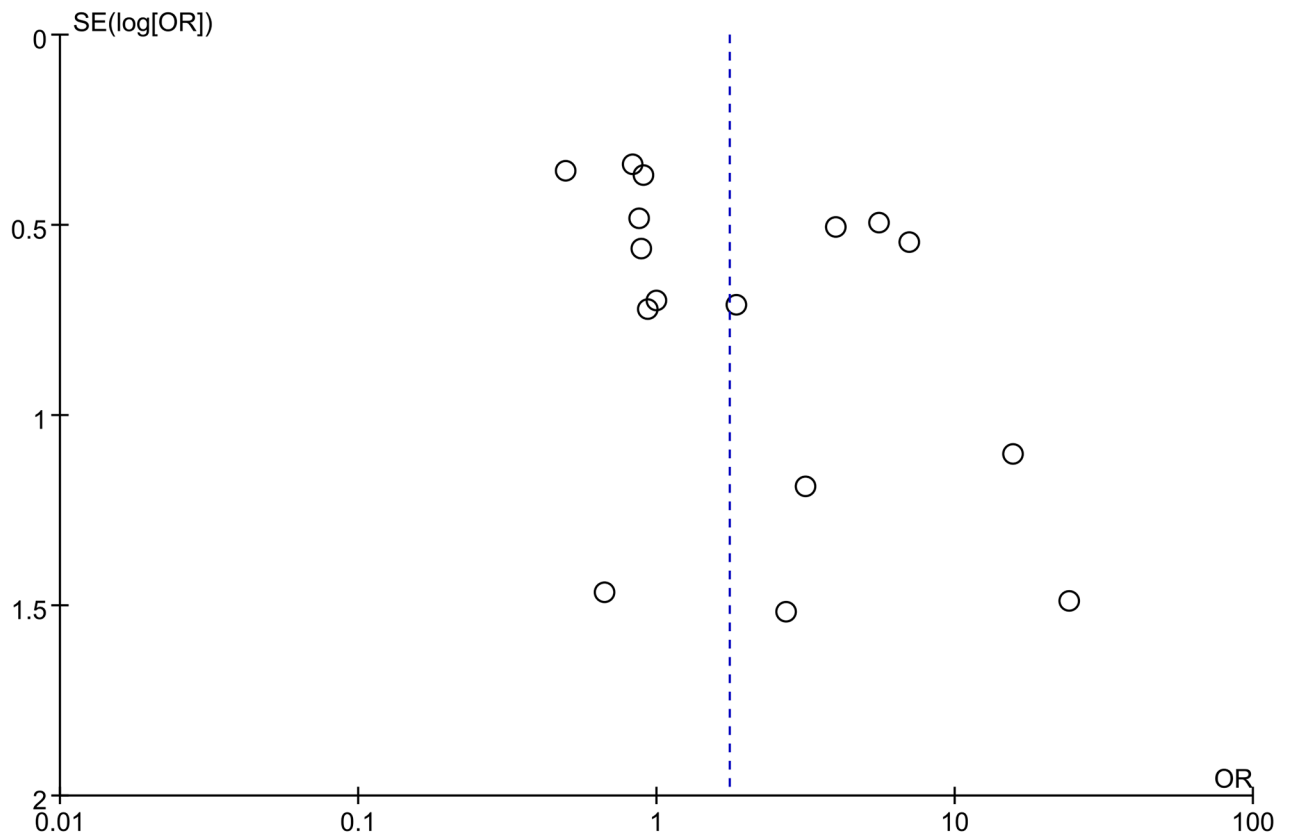

Supplementary Figure 3: Funnel plots of publication bias in the meta-analysis of HDAC1 expression and tumor grade.

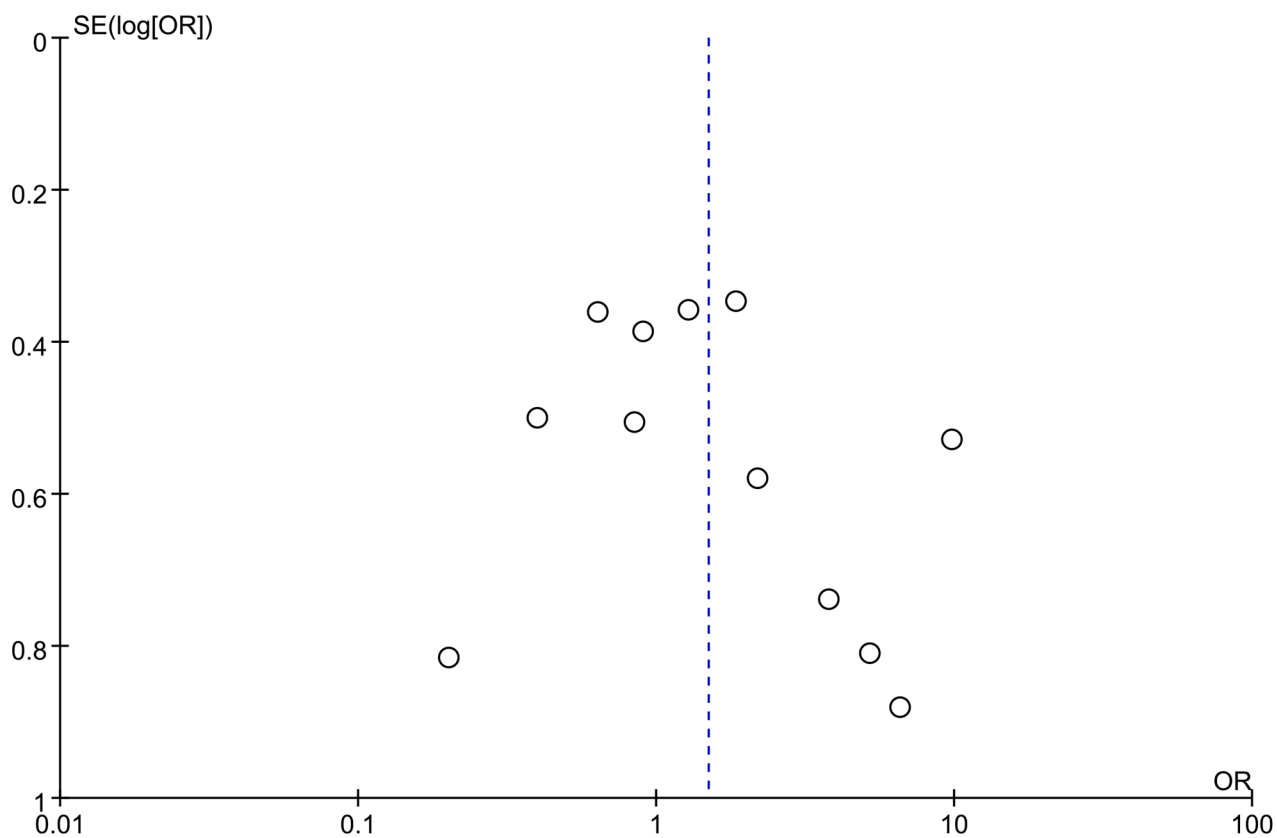

Supplementary Figure 4: Funnel plots of publication bias in the meta-analysis of HDAC1 expression and lymph node metastasis.

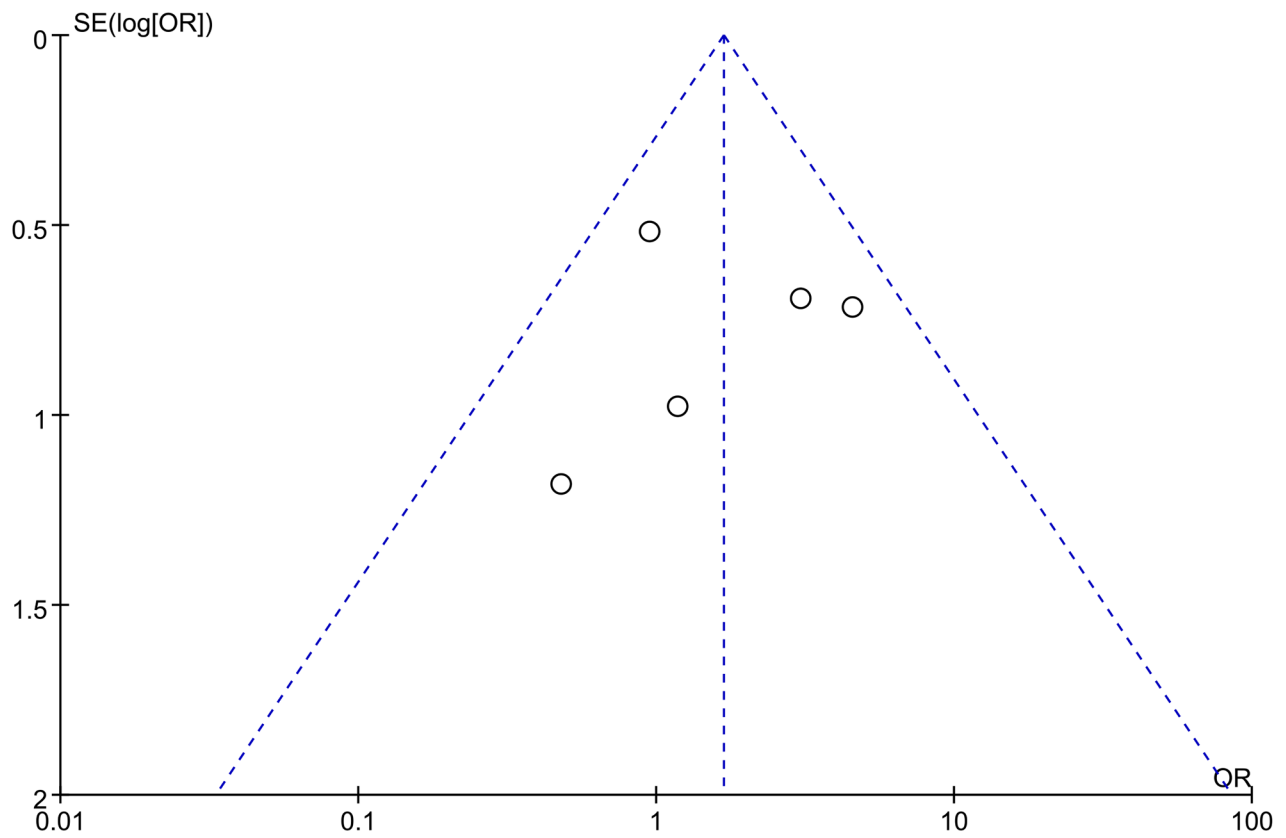

Supplementary Figure 5: Funnel plots of publication bias in the meta-analysis of HDAC1 expression and distant metastasis.

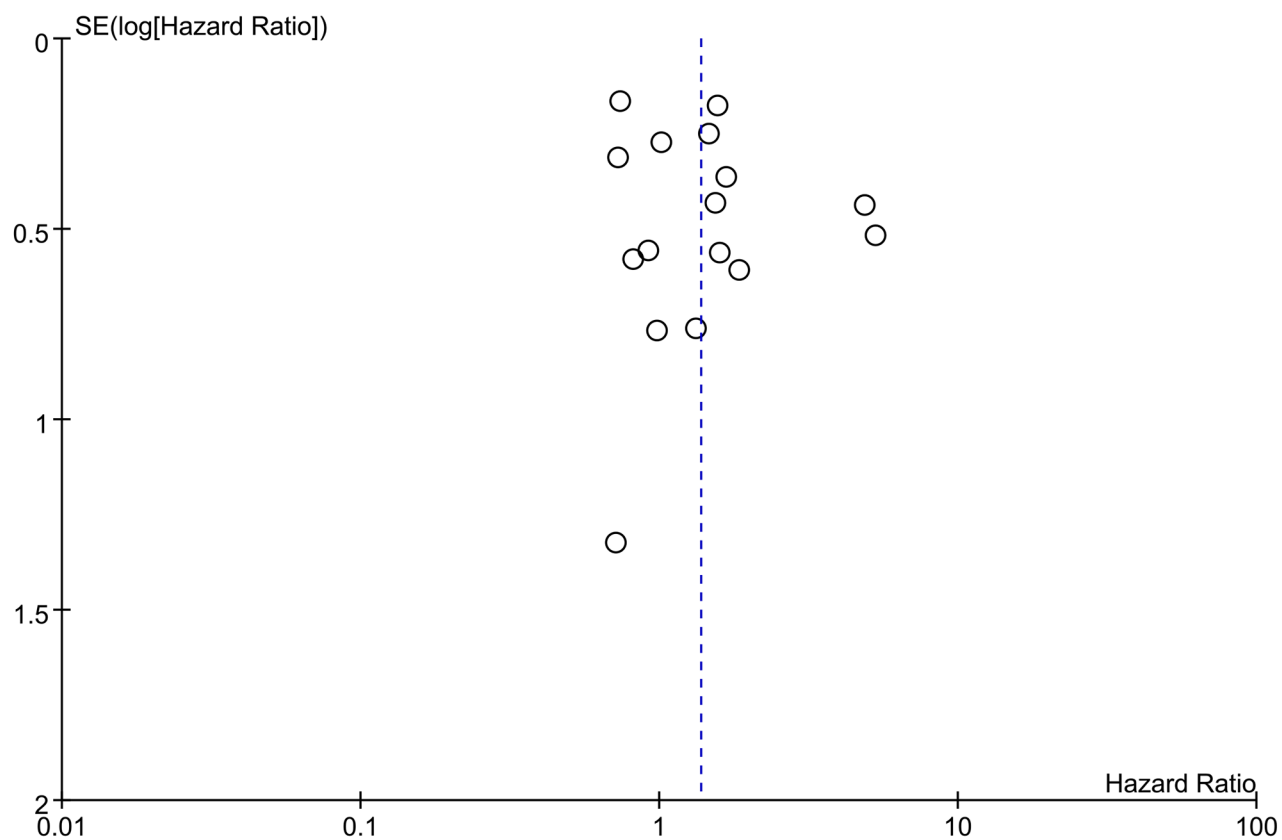

Supplementary Figure 6: Funnel plots of publication bias in the meta-analysis of HDAC1 expression and OS as shown in Figure 8.
